# Supplementary material for: Oximetry-supported self-management for chronic obstructive pulmonary disease: mixed method feasibility pilot project
Source: PubMed Central journal article supplement (PMC4624181; doi:10.1186/s12913-015-1135-2), 2015-10-26
Supplement: 12913_2015_1135_MOESM1_ESM.pdf [file 12913_2015_1135_MOESM1_ESM.pdf]

**NAME:** .....

**COPD Symptom Diary**

Please complete daily and record your Oxygen score

|                  | <b>Oxygen Reading</b> | <b>Antibiotic</b> | <b>Steroid</b> | <b>Additional info:</b> |
|------------------|-----------------------|-------------------|----------------|-------------------------|
| <b>Monday</b>    |                       |                   |                |                         |
| <b>Tuesday</b>   |                       |                   |                |                         |
| <b>Wednesday</b> |                       |                   |                |                         |
| <b>Thursday</b>  |                       |                   |                |                         |
| <b>Friday</b>    |                       |                   |                |                         |
| <b>Saturday</b>  |                       |                   |                |                         |
| <b>Sunday</b>    |                       |                   |                |                         |
| <b>Monday</b>    |                       |                   |                |                         |
| <b>Tuesday</b>   |                       |                   |                |                         |
| <b>Wednesday</b> |                       |                   |                |                         |
| <b>Thursday</b>  |                       |                   |                |                         |
| <b>Friday</b>    |                       |                   |                |                         |
| <b>Saturday</b>  |                       |                   |                |                         |
| <b>Sunday</b>    |                       |                   |                |                         |
| <b>Monday</b>    |                       |                   |                |                         |
| <b>Tuesday</b>   |                       |                   |                |                         |
| <b>Wednesday</b> |                       |                   |                |                         |
| <b>Thursday</b>  |                       |                   |                |                         |
| <b>Friday</b>    |                       |                   |                |                         |
| <b>Saturday</b>  |                       |                   |                |                         |
| <b>Sunday</b>    |                       |                   |                |                         |
