# Supplementary material for: Oximetry-supported self-management for chronic obstructive pulmonary disease: mixed method feasibility pilot project
Source: PubMed Central journal article supplement (PMC4624181; doi:10.1186/s12913-015-1135-2), 2015-10-26
Supplement: 12913_2015_1135_MOESM4_ESM.pdf [file 12913_2015_1135_MOESM4_ESM.pdf]

### Additional file 4a: Coding framework (patients)

| Themes                                                     | Sub-themes                                                                                                                                                                                                                   |
|------------------------------------------------------------|------------------------------------------------------------------------------------------------------------------------------------------------------------------------------------------------------------------------------|
| 1. Establishing the 'norm'                                 | <ul style="list-style-type: none"> <li>• It is part of the routine</li> <li>• Establishing a pattern in the readings</li> </ul>                                                                                              |
| 2. The pulse oximeter as a guide to wellbeing in real time | <ul style="list-style-type: none"> <li>• Interpreting and differentiating the variations of symptoms</li> </ul>                                                                                                              |
| 3. Gaining control and response to the readings            | <ul style="list-style-type: none"> <li>• Adapting to life with COPD</li> <li>• "Some days I am better, some days I am worse"</li> <li>• Exploring the boundaries</li> </ul>                                                  |
| 4. Less reliance on the healthcare professionals           | <ul style="list-style-type: none"> <li>• "The healthcare professionals does the exact same thing"</li> <li>• "The readings are for the healthcare professionals to see"</li> <li>• Some people don't like control</li> </ul> |

### Additional file 4b: Coding framework (health professionals)

| Themes                                                   | Sub-themes                                                                                                                                                         |
|----------------------------------------------------------|--------------------------------------------------------------------------------------------------------------------------------------------------------------------|
| 1. Selection of patients to self-manage                  | <ul style="list-style-type: none"> <li>• Identifying patient's self-management capabilities</li> <li>• Identifying patient's support network</li> </ul>            |
| 2. Pulse oximeter as a teaching tool                     | <ul style="list-style-type: none"> <li>• Interpreting and differentiating the variations of symptoms</li> <li>• Ability to take action to self-medicate</li> </ul> |
| 3. Awareness of the 'Light Touch' telemonitoring service | <ul style="list-style-type: none"> <li>• Service awareness</li> <li>• Being seen as the expert in COPD</li> </ul>                                                  |
| 4. Reorganisation of care                                | <ul style="list-style-type: none"> <li>• Changes in the provision of service</li> </ul>                                                                            |
| 5. Loss of engagement                                    | <ul style="list-style-type: none"> <li>• Managing the risks/patient safety</li> <li>• Strategies to encourage patients to self refer</li> </ul>                    |

### Additional file 4c: Coding framework (managers)

| Themes                                                        | Sub-themes                                                                                                                                                                                                                       |
|---------------------------------------------------------------|----------------------------------------------------------------------------------------------------------------------------------------------------------------------------------------------------------------------------------|
| 1. Thinking of technology every part of the patient's pathway | <ul style="list-style-type: none"><li>• Preparing staff and patients</li><li>• New ways to assess and manage long-term conditions in an ageing population</li></ul>                                                              |
| 2. Awareness of the 'Light Touch' telemonitoring service      | <ul style="list-style-type: none"><li>• Service awareness – anticipated work overload</li><li>• Individualised patient care</li></ul>                                                                                            |
| 3. Reorganisation of care                                     | <ul style="list-style-type: none"><li>• Florence service</li><li>• Telehealthcare</li><li>• Broad spectrum care</li><li>• Lack of cost effective care model for NHS Lothian</li><li>• Logistic of care – Who monitors?</li></ul> |
