# Supplementary material for: Oximetry-supported self-management for chronic obstructive pulmonary disease: mixed method feasibility pilot project
Source: PubMed Central journal article supplement (PMC4624181; doi:10.1186/s12913-015-1135-2), 2015-10-26
Supplement: 12913_2015_1135_MOESM5_ESM.pdf [file 12913_2015_1135_MOESM5_ESM.pdf]

**Additional file 5.**  
**COPD Light Touch Meeting Schedule (1<sup>st</sup> April 2014)**

Chair: Hilary Pinnock

Delegates: Three patients: and one spouse.

Six members of the community respiratory services (including a manager, physiotherapists, long-term condition nurses, and a student)

Five members of the Light Touch team (SHL, MM, JH, LMcC, BMcK)

Three members of the wider TeleScot team (including SB)

**Agenda:**

**10.00 Welcome** – House Keeping

**10.15 The COPD Light Touch study initial results** – Short presentations (HP, MM, SHL)

**11:00 Any questions** – Brief opportunity to ask questions about the presentation

**11.15** Coffee

**11.25 Discussion** –facilitated by members of the TeleScot team not directly involved in data collection and analysis. General discussion on agreement/disagreement with the preliminary findings. Specific questions included:

What aspects of Light Touch helped you (your patients) look after your (their) COPD?

Would it make a difference if someone had been monitoring your (their) readings?

How often is routine review required/wanted?

**11:50 Summary of discussions.** – What happens next? –dissemination.

**12.00 Thank you and close**
