# Supplementary material for: Oximetry-supported self-management for chronic obstructive pulmonary disease: mixed method feasibility pilot project
Source: PubMed Central journal article supplement (PMC4624181; doi:10.1186/s12913-015-1135-2), 2015-10-26
Supplement: 12913_2015_1135_MOESM6_ESM.pdf [file 12913_2015_1135_MOESM6_ESM.pdf]

## Additional file 6a: Patient Reported Outcomes

### 1. St Georges Respiratory Questionnaire (SGRQ)

Scores at baseline and 6-months

|                             | Baseline (n=51)     | 6 month (n=46)      |
|-----------------------------|---------------------|---------------------|
| Median overall score (IQR)  | 65.64 (53.31-71.99) | 57.39 (47.98-65.96) |
| Median symptoms score (IQR) | 82.02 (69.05-90.50) | 78.80 (70.30-88.60) |
| Median activity score (IQR) | 70.09 (59.24-85.87) | 60.56 (48.62-75.61) |
| Median impact score (IQR)   | 51.79 (38.88-67.07) | 47.22 (33.96-61.90) |

Number (Proportion) with a clinically significant difference (+/- ≥4) at 6-month follow-up

|                                                | Male   | Female  | Overall |
|------------------------------------------------|--------|---------|---------|
| Number of participants with improved score (%) | 9 (20) | 12 (26) | 21 (46) |
| Number of participants with a worse score (%)  | 7 (15) | 5 (11)  | 12 (26) |
| Number of participants with no difference (%)  | 5 (11) | 8 (17)  | 13 (28) |

### 2. Hospital Anxiety and Depression Score (HADS)

Scores at baseline and 6-months

|                               | Baseline (n=51)     | 6 month (n=46)     |
|-------------------------------|---------------------|--------------------|
| Median overall score (IQR)    | 12.00 (10.00-18.50) | 10.00 (7.00-16.25) |
| Median anxiety score (IQR)    | 7.00 (4.00-12.00)   | 6.00 (2.75-8.25)   |
| Median depression score (IQR) | 6.00 (3.75-8.00)    | 4.50 (3.00-6.00)   |

Number (Proportion) with a borderline/abnormal anxiety score at baseline and 6-months

|                                                            | Baseline (n=51) | 6 month (n=46) |
|------------------------------------------------------------|-----------------|----------------|
| Participants with borderline/abnormal anxiety score (%)    | 25 (49)         | 16 (35)        |
| Participants with normal anxiety score (%)                 | 26 (51)         | 30 (65)        |
| Participants with borderline/abnormal depression score (%) | 18 (35)         | 9 (20)         |
| Participants with normal depression score (%)              | 33 (65)         | 37 (80)        |

### 3. Patient Activation Measure (PAM)

Scores at baseline and 6-months

|                               | Baseline (n=51)    | 6 month (n=46)      |
|-------------------------------|--------------------|---------------------|
| Median activation score (IQR) | 56.40 (56.4-72.85) | 56.40 (52.90-73.10) |

Number (proportion) at the different stages of activation at baseline and 6-months

|                                       | Baseline<br>(n=51) | 6 month<br>(n=46) |
|---------------------------------------|--------------------|-------------------|
| Number of participants at Stage 1 (%) | 2 (4)              | 4 (9)             |
| Number of participants at Stage 2 (%) | 10 (20)            | 6 (13)            |
| Number of participants at Stage 3 (%) | 22 (43)            | 17 (37)           |
| Number of participants at Stage 4 (%) | 17 (33)            | 19 (41)           |

#### 4. EuroQol 5D (EQ-5D)

Scores at baseline and 6-months

|                                          | Baseline (n=51)  | 6 month (n=46)   |
|------------------------------------------|------------------|------------------|
| Median overall health state tariff (IQR) | 0.59 (0.27-0.74) | 0.71 (0.38-0.83) |
| Mean visual analogue scale score (SD)    | 52.55 (19.92)    | 56.22 (18.37)    |

Number (proportion) with a difference in health state tariffs at baseline and 6-months

|                                                                         | 6 month (n=46) |
|-------------------------------------------------------------------------|----------------|
| Number reporting a higher health state tariff at six months (%)         | 28 (61)        |
| Number reporting a lower health state tariff at six months (%)          | 16 (35)        |
| Number reporting the same health state tariff at six months (%)         | 2 (4)          |
| Number reporting a higher visual analogue scale score at six months (%) | 22(48)         |
| Number reporting a lower visual analogue scale score at six months (%)  | 16 (35)        |
| Number reporting the same visual analogue scale score at six months (%) | 8 (17)         |

A higher tariff/visual analogue score indicates a better quality of life

Number (proportion) reporting problems in the five dimensions of the EQ-5D at baseline and 6-months.

|                                                     | Baseline (n=51) | 6 month (n=46) |
|-----------------------------------------------------|-----------------|----------------|
| Number reporting problems with mobility (%)         | 38 (75)         | 29 (63)        |
| Number reporting problems with self-care (%)        | 29 (57)         | 24 (52)        |
| Number reporting problems with usual activities (%) | 39 (76)         | 22 (48)        |
| Number reporting pain/discomfort (%)                | 27 (53)         | 22 (48)        |
| Number reporting anxiety/depression (%)             | 24 (47)         | 10 (22)        |

## Additional file 6b: Use of healthcare resources

### 1. Secondary healthcare use

Number of visits in study 6-months and the equivalent 6-months the previous year

|                                                              | Study 6-months<br>(n=46)                    | 6 month previous<br>year (n=45)             |
|--------------------------------------------------------------|---------------------------------------------|---------------------------------------------|
| <b>A&amp;E visits</b>                                        |                                             |                                             |
| Number (%) of patients visiting A&E at least once            | 16 (35)                                     | 15 (33)                                     |
| Median number of visits/patient (IQR)                        | 0.00 (0.00-1.00)<br>range 1-6               | 0.00 (0.00-1.00)<br>range 1-8               |
| <b>Hospital outpatient appointments</b>                      |                                             |                                             |
| Number (%) of patients attending at least once               | 17 (37%)                                    | 18 (40)                                     |
| Median number of appointments/patient (IQR)                  | 0.00 (0.00-1.00)<br>range 1-4               | 0.00 (0.00-1.00)<br>range 1-4               |
| <b>Hospital Inpatient admissions</b>                         |                                             |                                             |
| Number (%) of patients with at least one admission           | 12 (26%)                                    | 15 (33)                                     |
| Median length of hospital stay in bed days per patient (IQR) | 0.00 (0.00-2.00) <sup>a</sup><br>range 1-38 | 0.00 (0.00-1.50) <sup>b</sup><br>range 1-31 |

<sup>a</sup> 5(42%) of the 12 inpatients accounted for 74% of the days in hospital

<sup>b</sup> 4 (27%) of the 15 inpatients accounted for 70% of the days in hospital

### 2. Primary healthcare use

Number of GP consultations in study 6-months and the equivalent 6-months the previous year

|                                                                    | Study 6-months<br>(n=46)       | 6 month previous<br>year (n=45) |
|--------------------------------------------------------------------|--------------------------------|---------------------------------|
| <b>GP surgery consultations</b>                                    |                                |                                 |
| Number (%) of patients with at least one GP surgery consultation   | 28 (61)                        | 34 (78)                         |
| Median number of GP surgery consultations/patient (IQR)            | 1.00 (0.00-2.00)<br>range 1-8  | 0.00 (0.00-1.00)<br>range 1-5   |
| <b>GP home visits</b>                                              |                                |                                 |
| Number (%) of patients with at least one GP home visit             | 26 (57)                        | 13 (26)                         |
| Median number of GP home visits/patient (IQR)                      | 1.00 (0.00-4.50)<br>range 1-6  | 2.00 (0.50-4.50)<br>range 1-5   |
| <b>GP telephone consultations</b>                                  |                                |                                 |
| Number (%) of patients with at least one GP telephone consultation | 27 (59)                        | 16 (36)                         |
| Median number of GP telephone consultations/patient (IQR)          | 1.00 (0.00-2.00)<br>range 1-10 | 0.00 (0.00-1.50)<br>range 1-8   |

### 3. Medication prescribed

Number and proportion of patients receiving prescriptions and the median (IQR) prescriptions/patient in the study 6-months and the equivalent 6-months the previous year,

|                                                                             | Study 6-months<br>(n=46)       | 6 month previous<br>year (n=45) |
|-----------------------------------------------------------------------------|--------------------------------|---------------------------------|
| <b>Antibiotics</b>                                                          |                                |                                 |
| Number (%) of patients prescribed antibiotics at least once                 | 43 (93)                        | 32 (71)                         |
| Median number of antibiotic prescriptions per patient (IQR)                 | 3.00 (2.00-6.50)<br>range 1-11 | 2.00 (0.00-4.50)<br>range 1-16  |
| <b>Oral prednisolone</b>                                                    |                                |                                 |
| Number (%) of patients prescribed oral prednisolone (steroid) at least once | 39 (85)                        | 29 (64)                         |
| Median number of oral prednisolone prescriptions per patient (IQR)          | 3.0 (1.00-5.50)<br>range 1-14  | 2.00 (0.00-3.00)<br>range 1-12  |
| <b>Nebulised bronchodilators</b>                                            |                                |                                 |
| Number (%) of patients prescribed nebulised therapy at least once           | 24 (52)                        | 17 (38)                         |
| Median number of nebulised therapy prescriptions per patient (IQR)          | 1.00 (0.00-4.00)<br>range 1-17 | 0.00 (0.00-2.00)<br>range 1-8   |
| <b>Bronchodilator inhalers</b>                                              |                                |                                 |
| Number (%) of patients prescribed inhaled bronchodilators at least once     | 39 (85)                        | 29 (64)                         |
| Median number of inhaled bronchodilator prescriptions per patient (IQR)     | 3.0 (1.00-5.50)<br>range 1-14  | 2.00 (0.00-3.00)<br>range 1-12  |
